# Supplementary material for: Theoretical Analysis On The Electrical Performance Of Long Coaxial Cable At Different Temperature
Source: Royal Society of Chemistry journal article supplement (doi:10.1039/c9an02265a), 2006-01-01
Supplement: c9an02265a1.pdf [file c9an02265a1.pdf]

## Supplementary Information (SI)

For

A new chromogenic and fluorescence chemosensor based on naphthol–bisthiazolopyridine hybrid: Fast response and selective detection of multiple targets, silver, cyanide, sulfide, hydrogen sulfide ions and gaseous H<sub>2</sub>S

Maryam Kargar,<sup>a</sup> Hossein Reza Darabi,<sup>a,\*</sup> Ali Sharifi,<sup>a</sup> Abdoljalil Mostashari<sup>b</sup>

Nano & Organic Synthesis Lab., Chemistry & Chemical Engineering Research Center of  
Iran, Pajooresh Blvd., km 17, Karaj Hwy, Tehran 14968-13151, Iran. Tel.: +98 21 44787720;  
Fax: +98 21 44787762

darabi@ccerci.ac.ir; r\_darabi@yahoo.com

## Table of contents

|                                                                                                                                                                                                                                                                         | Page |
|-------------------------------------------------------------------------------------------------------------------------------------------------------------------------------------------------------------------------------------------------------------------------|------|
| <b>Figure S1.</b> $^1\text{H}$ NMR of compound <b>1</b> and its expansion spectrum                                                                                                                                                                                      | 5    |
| <b>Figure S2.</b> $^{13}\text{C}$ NMR (125 MHz, $\text{DMSO-}d_6$ ) spectrum of <b>1</b>                                                                                                                                                                                | 7    |
| <b>Figure S3.</b> Mass spectrum of compound <b>1</b>                                                                                                                                                                                                                    | 8    |
| <b>Figure S4.</b> IR spectra of compound <b>1</b>                                                                                                                                                                                                                       | 9    |
| <b>Figure S5.</b> HPLC of compound <b>1</b>                                                                                                                                                                                                                             | 10   |
| <b>Figure S6.</b> Fluorescence spectra of <b>1</b> (A), $\mathbf{1}\cdot\text{Ag}^+$ (B), the effect of $\text{S}^{2-}$ on $\mathbf{1}\cdot\text{Ag}^+$ under various buffer solutions (C), and color images of pH-dependent response of <b>1</b> to $\text{CN}^-$ (D). | 11   |
| <b>Figure S7.</b> Absorbance spectra of <b>1</b> (A), $\mathbf{1}\cdot\text{Ag}^+$ (B), the effect of $\text{S}^{2-}$ on $\mathbf{1}\cdot\text{Ag}^+$ under various buffer solutions (C), and color images of pH-dependent response of <b>1</b> to $\text{CN}^-$ (D).   | 12   |
| <b>Figure S8.</b> Absorbance of <b>2</b> with 1 equivalent of $\text{Ag}^+$ .                                                                                                                                                                                           | 12   |
| <b>Figure S9.</b> Uv-vis (Left) and fluorescence (Right) response of <b>1</b> to various cations.                                                                                                                                                                       | 13   |
| <b>Figure S10.</b> Fluorescence response of <b>1</b> to various anions in $\text{MeOH:H}_2\text{O}$ (8:2).                                                                                                                                                              | 13   |
| <b>Figure S11.</b> Uv-vis (above) and Fluorescence (below) of sensor $\mathbf{1}\cdot\text{Ag}^+$ with addition of 10 equiv. of anions.                                                                                                                                 | 14   |
| <b>Figure S12.</b> Fluorescence (left) and Uv-vis (right) of sensor $\mathbf{1}\cdot\text{Cu}^{+2}$ with addition of 10 equiv. of various anions                                                                                                                        | 14   |
| <b>Figure S13.</b> Proposed structure of $\mathbf{1}\cdot\text{Cu}^{+2}$ (left) and Job plot for the binding of <b>1</b> and $\text{Cu}^{+2}$ (right).                                                                                                                  | 15   |
| <b>Table S1.</b> Absorbance titration of <b>1</b> with various concentration of $\text{Ag}^+$ .                                                                                                                                                                         | 15   |
| <b>Table S2.</b> Fluorescence titration of <b>1</b> with various concentration of $\text{Ag}^+$                                                                                                                                                                         | 15   |
| <b>Table S3.</b> Absorbance titration of $\mathbf{1}\cdot\text{Ag}^+$ with various concentration of $\text{S}^{2-}$                                                                                                                                                     | 16   |
| <b>Table S4.</b> Fluorescence titration of $\mathbf{1}\cdot\text{Ag}^+$ with various concentration of $\text{S}^{2-}$                                                                                                                                                   | 16   |
| <b>Figure S14.</b> Job plot for the binding of <b>1</b> and $\text{Ag}^+$ .                                                                                                                                                                                             | 16   |
| <b>Figure S15.</b> Job plot for the binding of $\mathbf{1}\cdot\text{Ag}^+$ and $\text{S}^{2-}$ .                                                                                                                                                                       | 17   |
| <b>Figure S16.</b> Job plot for the binding of <b>1</b> and $\text{CN}^-$ .                                                                                                                                                                                             | 17   |
| <b>Table S5.</b> Absorbance titration of <b>1</b> with various concentration of $\text{CN}^-$                                                                                                                                                                           | 17   |

|                                                                                                                                                                                                                |           |
|----------------------------------------------------------------------------------------------------------------------------------------------------------------------------------------------------------------|-----------|
| <b>Table S6.</b> Fluorescence titration of <b>1</b> with various concentration of $\text{CN}^-$                                                                                                                | <b>18</b> |
| <b>Table S7.</b> Absorbance titration of $\mathbf{1}\cdot\mathbf{Ag}^+$ with various concentration of $\text{HS}^-$                                                                                            | <b>18</b> |
| <b>Table S8.</b> Fluorescence titration of $\mathbf{1}\cdot\mathbf{Ag}^+$ with various concentration of $\text{HS}^-$                                                                                          | <b>19</b> |
| <b>Table S9.</b> Fluorescence titration of $\mathbf{1}\cdot\mathbf{Ag}^+$ with various concentration of $\text{S}^{2-}$ in PBS buffer solution at pH 7.4.                                                      | <b>19</b> |
| <b>Table S10.</b> Fluorescence titration of $\mathbf{1}\cdot\mathbf{Ag}^+$ with various concentration of $\text{HS}^-$ in PBS buffer solution at pH 7.4.                                                       | <b>20</b> |
| <b>Figure S17.</b> portable kit of $\text{Ag}^+$ : The naked eye ( <b>A</b> , under white light) and fluorescence ( <b>B</b> , under black light)                                                              | <b>20</b> |
| <b>Figure S18.</b> The comparison of Fluorescence spectra of <b>1</b> under addition of $\text{OH}^-$ and $\text{CN}^-$ ions.                                                                                  | <b>21</b> |
| <b>Figure S19.</b> The comparison of UV-Vis and Fluorescence spectra of <b>1</b> under addition of $\text{OH}^-$ and $\text{CN}^-$ ions and $\mathbf{1}\cdot\mathbf{Ag}^+$ under addition of $\text{S}^{2-}$ . | <b>21</b> |
| <b>Figure S20.</b> The titration of <b>1</b> under addition of 10 equiv. of $\text{OH}^-$ and $\text{H}^+$ ions.                                                                                               | <b>22</b> |
| <b>Table S11.</b> Comparison of <b>1</b> with other probes for detection of silver ions                                                                                                                        | <b>23</b> |
| <b>Table S12.</b> Comparison of <b>1</b> with other probes for detection of cyanide ions                                                                                                                       | <b>24</b> |
| <b>Table S13.</b> Comparison of <b>1</b> with other probes for detection of sulfide ions                                                                                                                       | <b>25</b> |

## Synthesis and characterization of **1**

We have recently introduced a new route to build bithiazolopyridine skeleton in one-pot Willgerodt-Kindler reaction, using easily accessible starting materials [39]. In this study, we obtained product **1** from the reaction of 2,6-diaminopyridine with 2-hydroxy-1-naphthaldehyde and elemental sulfur at 110 °C in 15% yield. The product **1** was characterized by <sup>1</sup>H NMR, <sup>13</sup>C NMR, IR, and ESI-MS analysis (Fig. S1-S4). The high purity of **1** was confirmed using HPLC (Fig. S5).

The <sup>1</sup>H and <sup>13</sup>C NMR spectra of **1** are in accord with the symmetry of this molecule. The <sup>1</sup>H NMR spectra of compound **1** showed two singlets at 11.58 and 9.43 ppm related to hydrogen bonded OH groups and pyridine, respectively. The naphthyl protons appear as four doublets at 8.99, 8.06, 7.95 and 7.40 ppm, as well as two triplets at 7.61 and 7.45 ppm (Fig. S1). The number of observed carbons by <sup>13</sup>C NMR spectra of **1** is in agreement with the C<sub>2</sub>-symmetric structure of **1** (Fig. S2). The mass spectrum of **1** showed a peak for the molecular ion at 477 m/z (Fig. S3).

L-64-H

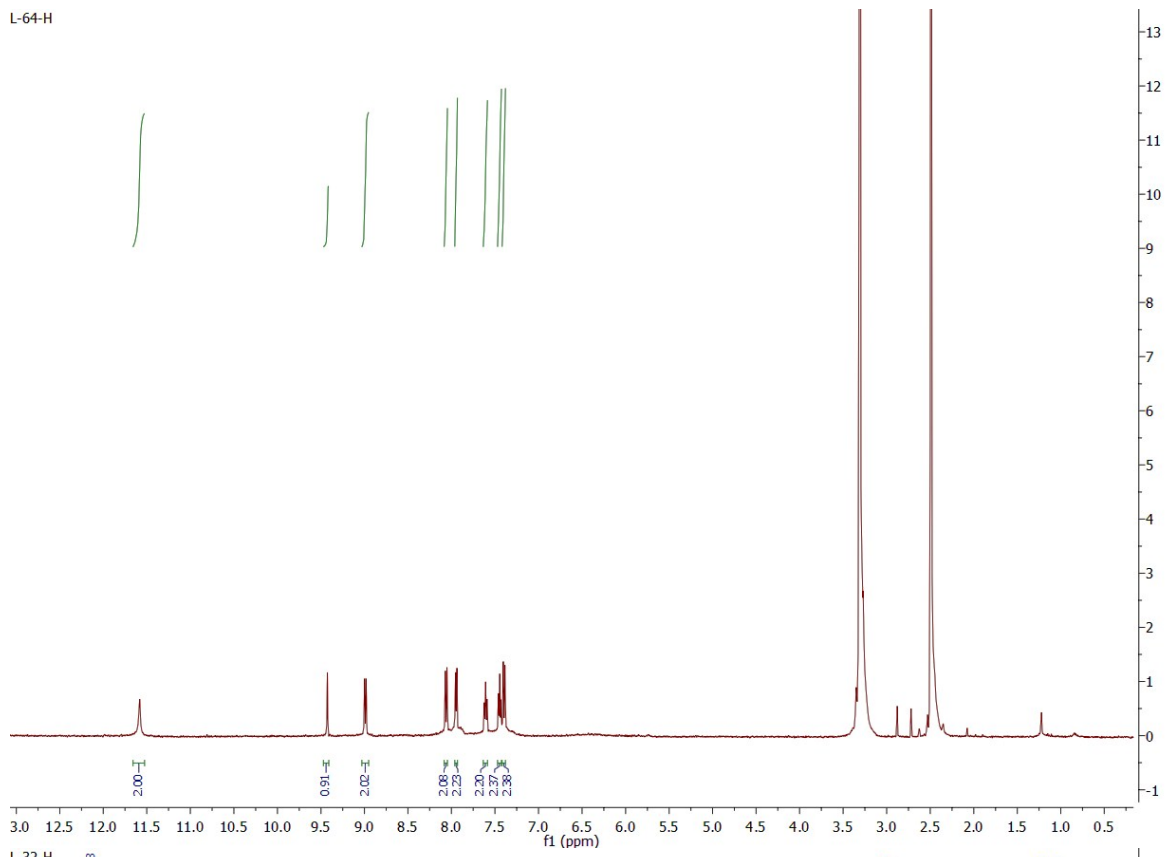

L-32-H

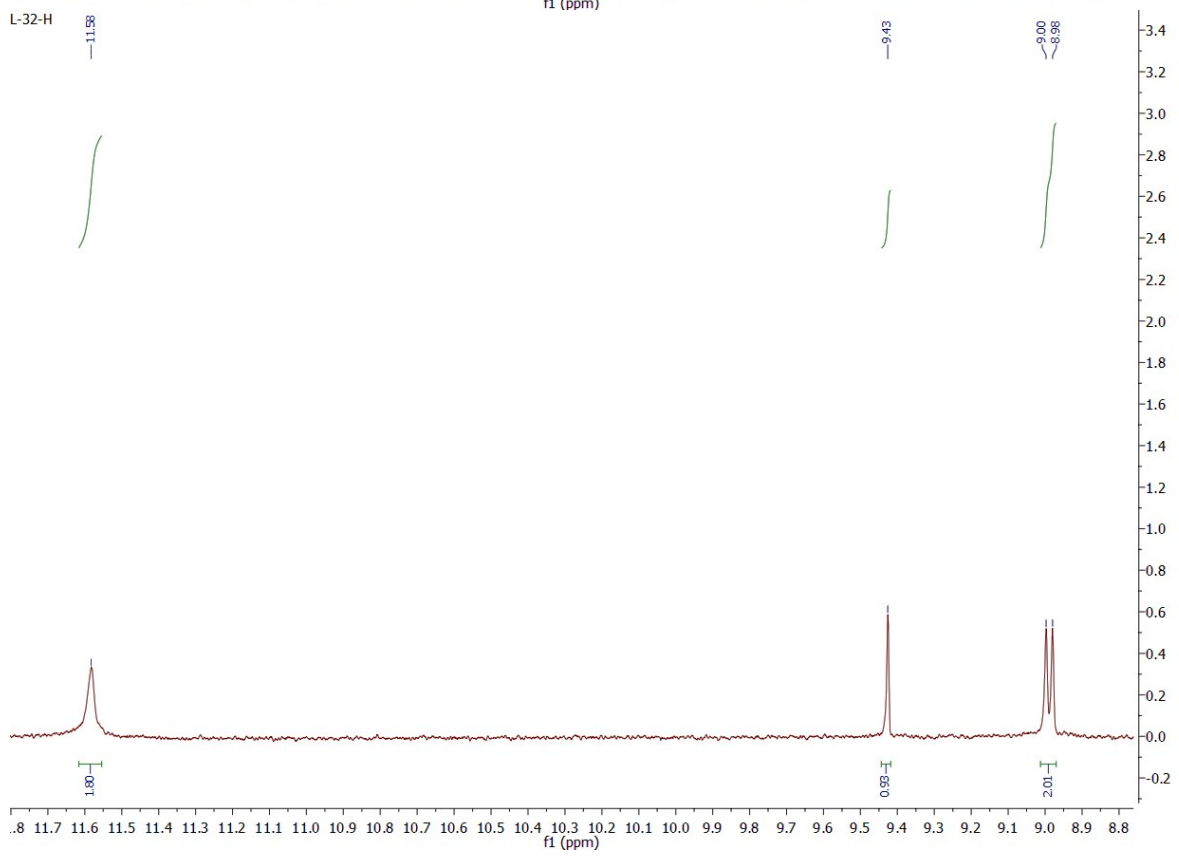

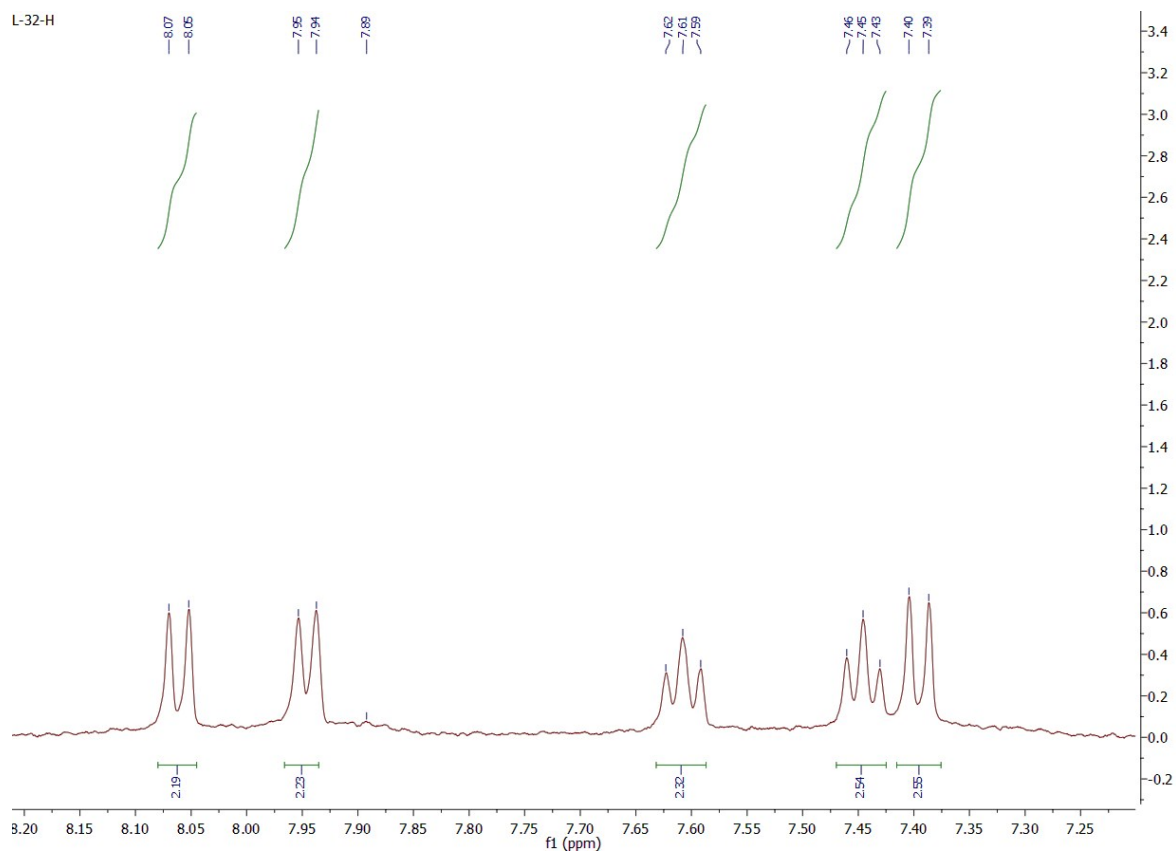

**Figure S1.**  $^1\text{H}$  NMR of compound **1** and its expansion spectrum (DMSO- $\text{d}_6$ , 500 MHz).

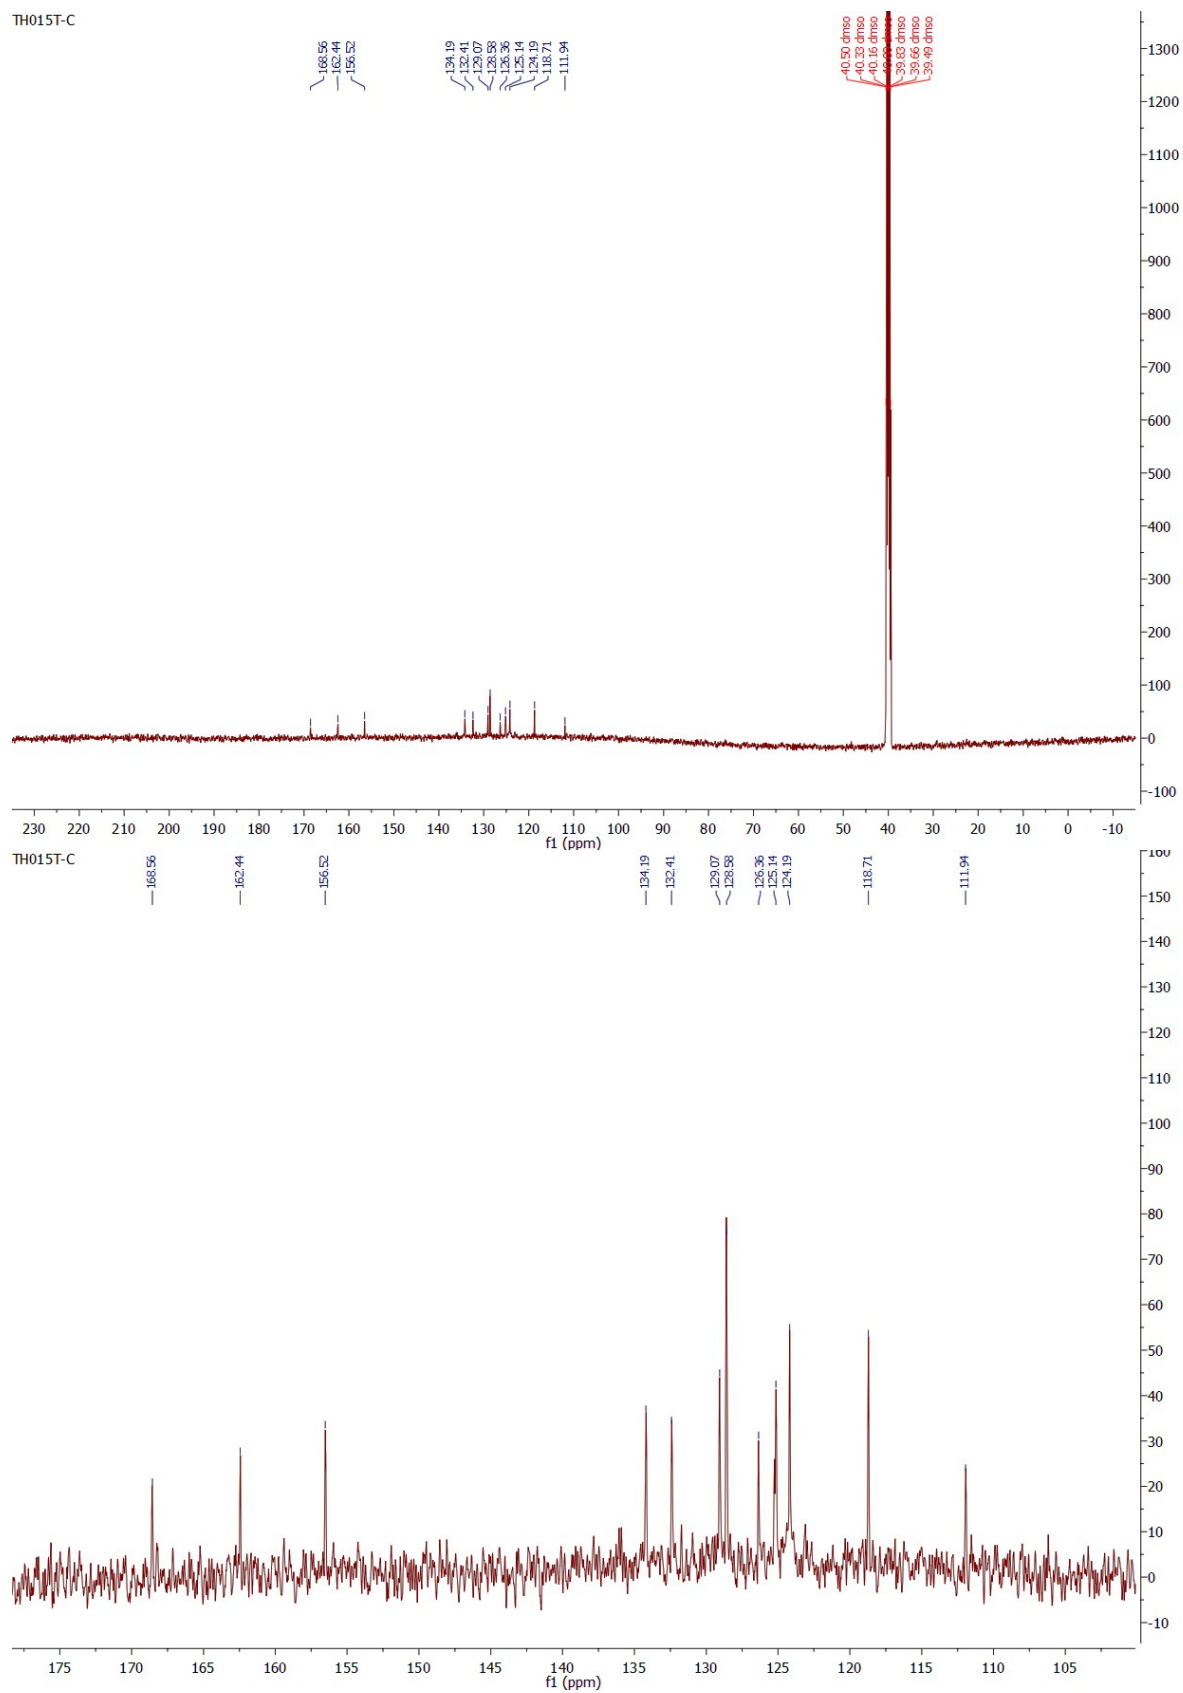

**Figure S2.**  $^{13}\text{C}$  NMR spectrum of compound **1** (DMSO- $d_6$ , 125 MHz).

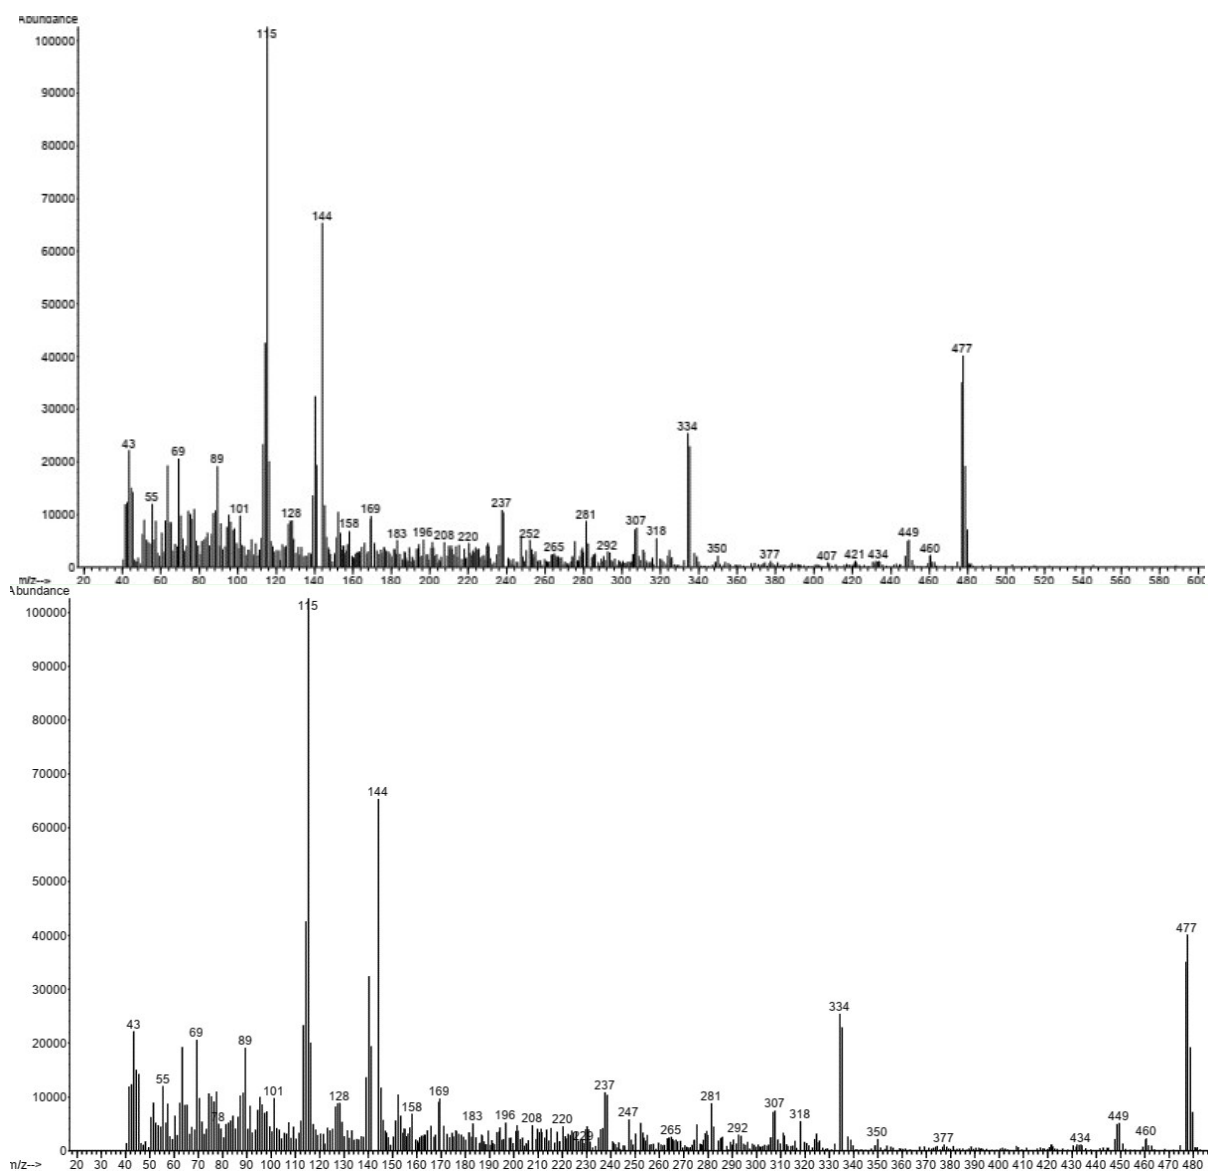

**Figure S3.** Mass spectrum of compound 1.



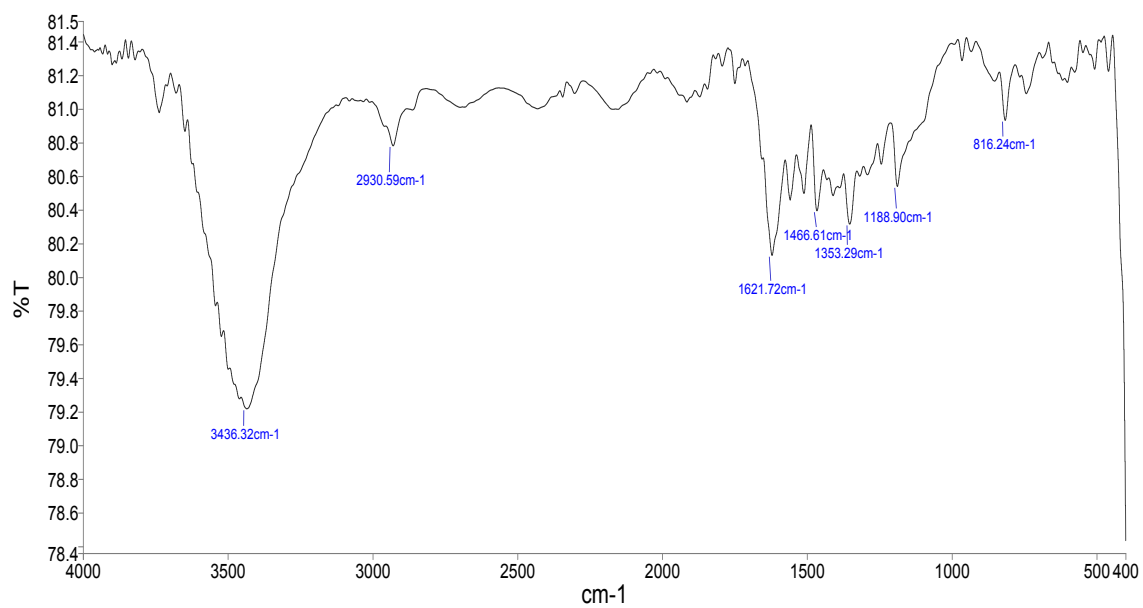

**Figure S4.** IR spectra of compound **1**.

Sample ID: kh.kargar-971102-sample 1-1  
 Method File: C:\EZChrom  
 Elite\Enterprise\Projects\Default\Method\A.Ahdeno-971115.met  
 Run Time: 1/22/2019 1:47:50 PM  
 User: R.Hajipoor  
 Method Create Date: 2/4/2019 11:58:03 AM  
 Data File: C:\EZChrom  
 Elite\Enterprise\Projects\Default\Data\Kh.kargar-971107\kh.kargar-971102-sample 1-1.dat  
 Instrument : HPLC (KNAUER - 101896)  
 Software: ChromGate Client/Server - Version 3.1.7

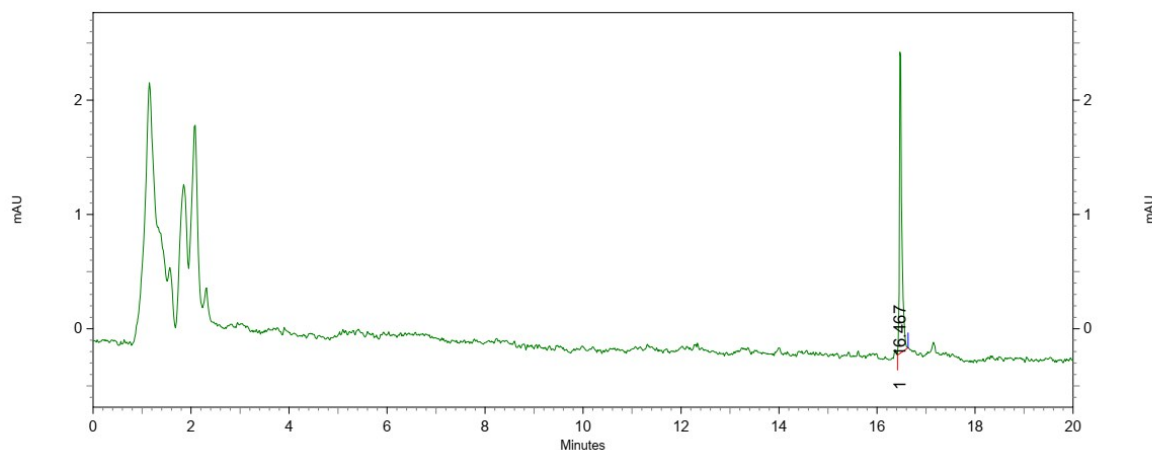

| Pk # | Retention Time | Area | Area Percent | Height |
|------|----------------|------|--------------|--------|
| 1    | 16.467         | 9015 | 100.000      | 2637   |

**Figure S5-a. HPLC of compound 1**

Sample ID: kh.kargar-971102-blank  
 Method File: C:\EZChrom  
 Elite\Enterprise\Projects\Default\Method\A.Ahdeno-971115.met  
 Run Time: 1/22/2019 2:13:36 PM  
 User: R.Hajipoor  
 Method Create Date: 2/4/2019 11:58:03 AM  
 Data File: C:\EZChrom  
 Elite\Enterprise\Projects\Default\Data\Kh.kargar-971107\kh.kargar-971102-blank.dat  
 Instrument : HPLC (KNAUER - 101896)  
 Software: ChromGate Client/Server - Version 3.1.7

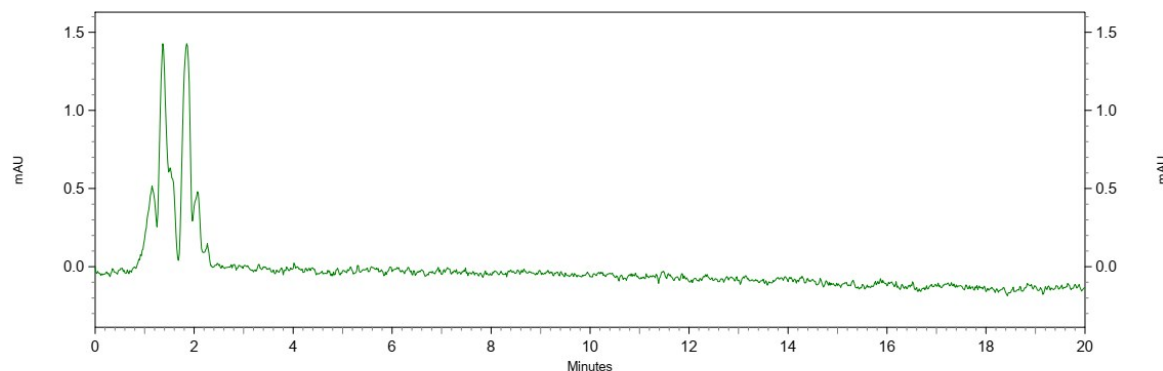

| Pk # | Retention Time | Area | Area Percent | Height |
|------|----------------|------|--------------|--------|
|------|----------------|------|--------------|--------|

**Figure S5-b. Blank of HPLC of compound 1**

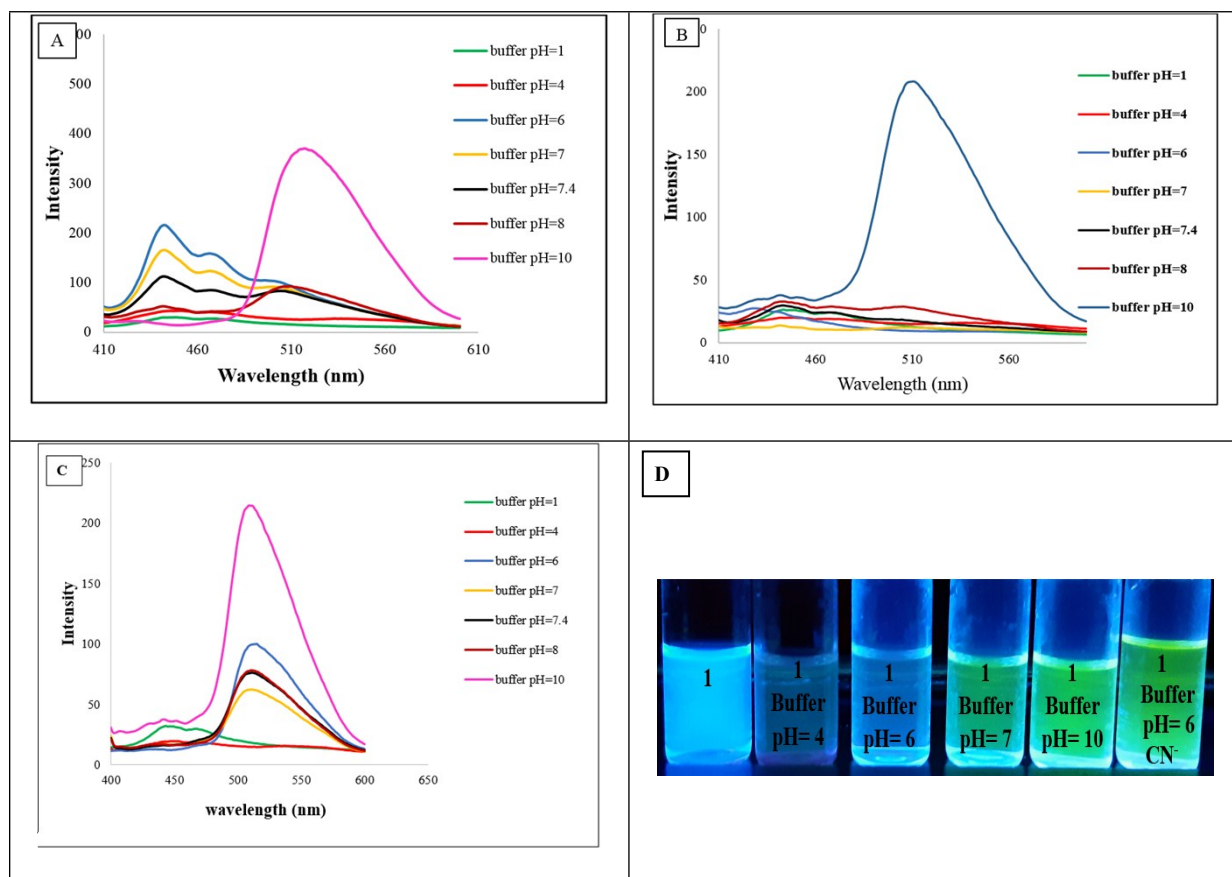

**Figure S6.** Fluorescence spectra of **1** (A) and **1**•Ag<sup>+</sup> (B) and addition of S<sup>2-</sup> on **1**•Ag<sup>+</sup> (C) under various buffer solutions. Color images of pH-dependent response of **1** to CN<sup>-</sup> from left: **1**, **1** in buffer pH 6, **1** in buffer pH 7, **1**+ CN<sup>-</sup> in buffer pH 6 (D).

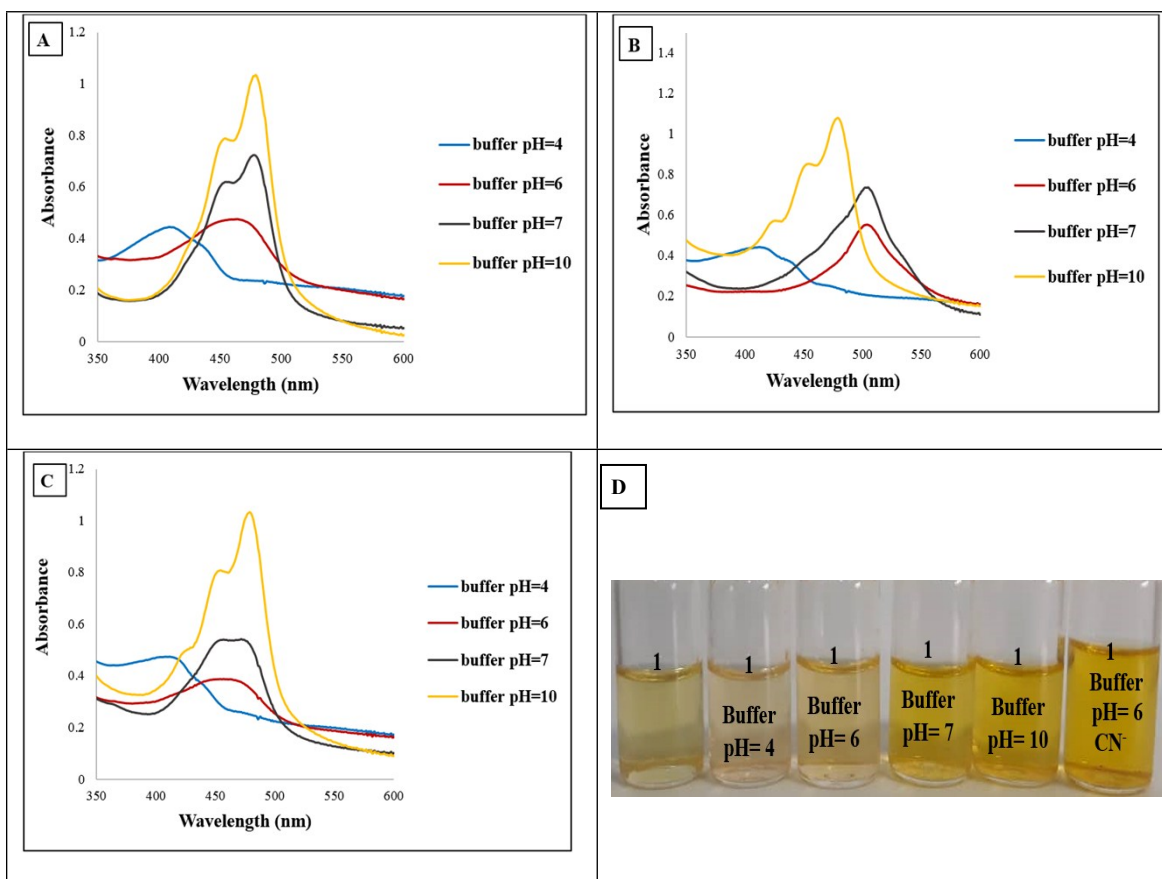

**Figure S7.** Absorbance spectra of **1** (A), **1**•Ag<sup>+</sup> (B), The effects of S<sup>2-</sup> on **1**•Ag<sup>+</sup> under various buffer solutions (C), and color images of pH-dependent response of **1** to CN<sup>-</sup> from left: **1**, **1** in buffer pH 6, **1** in buffer pH 7, **1**+ CN<sup>-</sup> in buffer pH 6 (D).

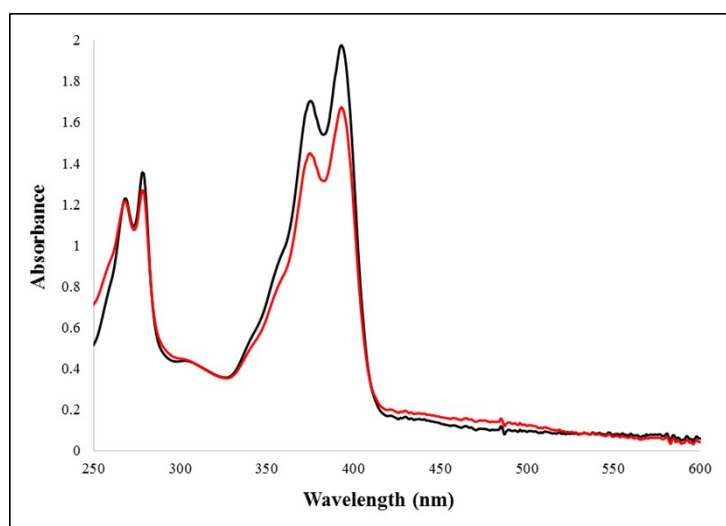

**Figure S8.** Absorbance of **2** with 1 equivalent of Ag<sup>+</sup>.

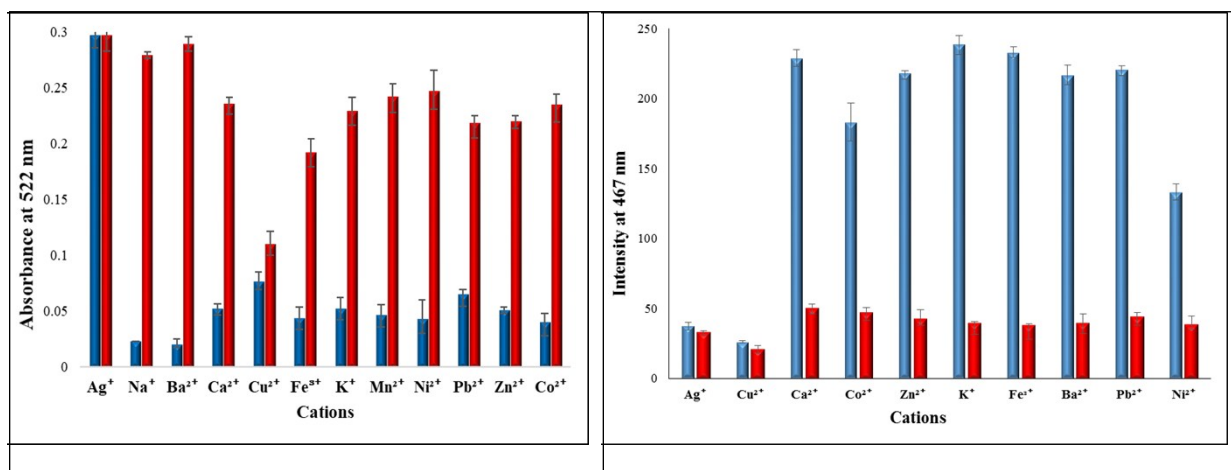

**Fig. S9.** Uv-vis (Left) and fluorescence (Right) response of **1** to various cations (1 equivalent of **1**) in MeOH/H<sub>2</sub>O (8:2, v/v). The intensity of fluorescence emission of **1** (0.05  $\mu$ mol) upon the addition of various metal ions (0.05  $\mu$ mol). Blue bars represent the fluorescence intensity of **1** in the presence of different metal ions. Red bars represent the fluorescence intensity of **1** in the presence of Ag<sup>+</sup> and other metal ions.

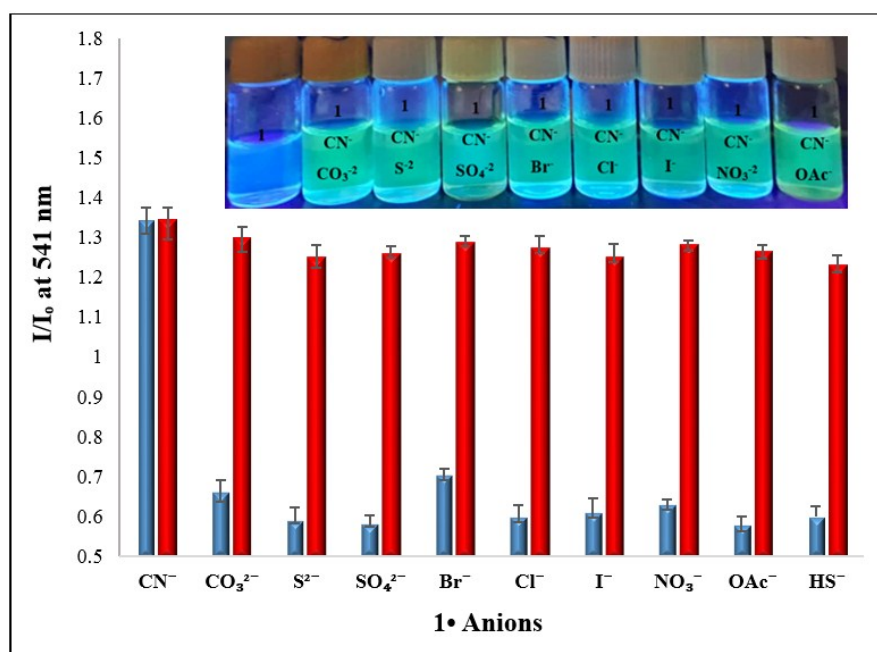

**Figure S10.** Fluorescence response of **1** to various anions in MeOH:H<sub>2</sub>O (8:2). Inside image: Competitive selectivity of **1** toward CN<sup>-</sup> in the presence of similar amounts of other anions under 366 nm UV light.

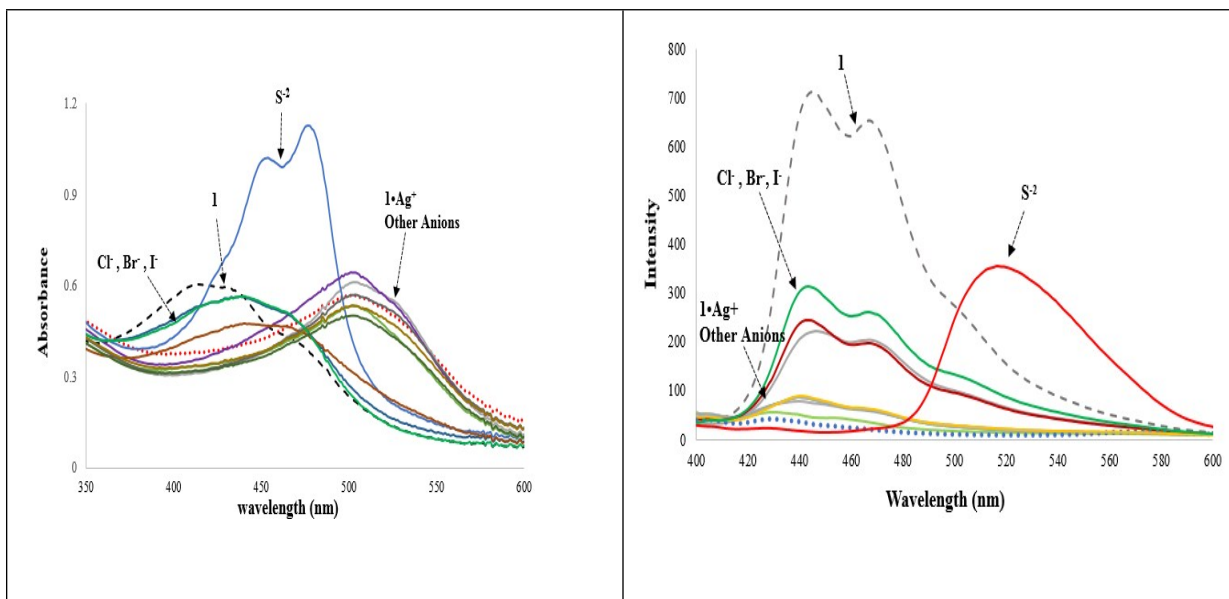

**Fig. S11.** Uv-vis (above) and Fluorescence (below) of sensor **1**•Ag<sup>+</sup> with addition of 10 equiv. of anions.

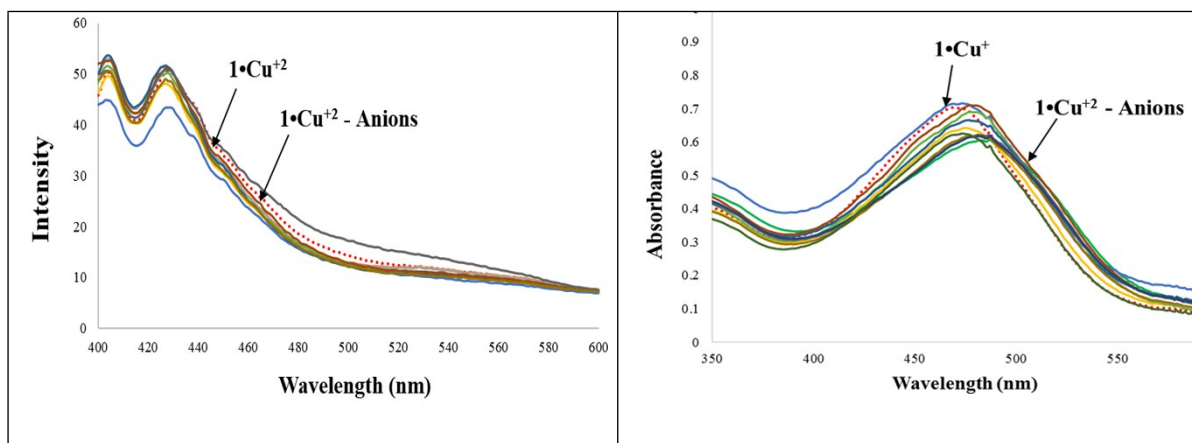

**Figure S12.** Fluorescence (left) and Uv-vis (right) of sensor **1**•Cu<sup>+2</sup> with addition of 10 equiv. of various anions.

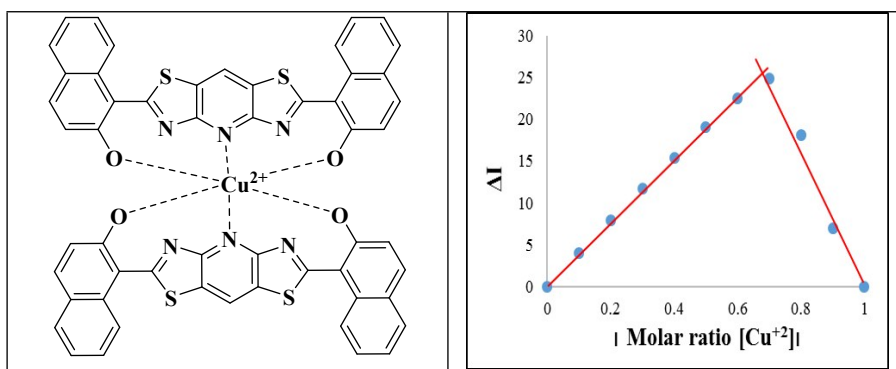

**Figure S13.** Proposed structure of **1**•Cu<sup>2+</sup> (left) and Job plot for the binding of **1** and Cu<sup>2+</sup>(right).

**Table S1.** Absorbance titration of **1** with various concentration of Ag<sup>+</sup>.

| V <sub>0</sub> | V <sub>t</sub> | C <sub>0</sub> | C <sub>t</sub> | eq  | A <sub>505</sub> | A/A <sub>0</sub> | A-A <sub>0</sub> |
|----------------|----------------|----------------|----------------|-----|------------------|------------------|------------------|
| 500            | 0              | 0.00005        | 0              | 0   | 0.163552284      | 1                | 0                |
| 500            | 10             | 4.9E-05        | 9.8E-06        | 0.2 | 0.177063942      | 1.082614         | 0.013512         |
| 500            | 30             | 4.72E-05       | 2.83E-05       | 0.6 | 0.254268646      | 1.554663         | 0.090716         |
| 500            | 40             | 4.63E-05       | 3.7E-05        | 0.8 | 0.306402683      | 1.873423         | 0.14285          |
| 500            | 50             | 4.55E-05       | 4.55E-05       | 1   | 0.354674129      | 2.168567         | 0.191122         |
| 500            | 60             | 4.46E-05       | 5.36E-05       | 1.2 | 0.393363953      | 2.405127         | 0.229812         |
| 500            | 70             | 4.39E-05       | 6.14E-05       | 1.4 | 0.433193207      | 2.648653         | 0.269641         |
| 500            | 80             | 4.31E-05       | 6.9E-05        | 1.6 | 0.470069408      | 2.874123         | 0.306517         |
| 500            | 90             | 4.24E-05       | 7.63E-05       | 1.8 | 0.480222225      | 2.9362           | 0.31667          |
| 500            | 100            | 4.17E-05       | 8.33E-05       | 2   | 0.48401022       | 2.959361         | 0.320458         |

**Table S2.** Fluorescence titration of **1** with various concentration of Ag<sup>+</sup>.

| V <sub>0</sub> | V <sub>t</sub> | C <sub>0</sub> | C <sub>t</sub> | eq       | I <sub>460</sub> | I/I <sub>0</sub> | I-I <sub>0</sub> |
|----------------|----------------|----------------|----------------|----------|------------------|------------------|------------------|
| 1050           | 0              | 0.00005        | 0              | 0        | 537.617          | 1                | 0                |
| 1050           | 10             | 4.95E-05       | 4.72E-06       | 0.095238 | 452.684          | 0.84202          | 84.933           |
| 1050           | 20             | 4.91E-05       | 9.35E-06       | 0.190476 | 379.442          | 0.705785         | 158.175          |
| 1050           | 30             | 4.86E-05       | 1.39E-05       | 0.285714 | 290.812          | 0.540928         | 246.805          |
| 1050           | 40             | 4.82E-05       | 1.83E-05       | 0.380952 | 204.968          | 0.381253         | 332.649          |
| 1050           | 50             | 4.77E-05       | 2.27E-05       | 0.47619  | 129.743          | 0.24133          | 407.874          |
| 1050           | 60             | 4.73E-05       | 2.7E-05        | 0.571429 | 83.6532          | 0.1556           | 453.9638         |
| 1050           | 70             | 4.69E-05       | 3.13E-05       | 0.666667 | 63.7446          | 0.118569         | 473.8724         |
| 1050           | 80             | 4.65E-05       | 3.54E-05       | 0.761905 | 45.0577          | 0.08381          | 492.5593         |
| 1050           | 90             | 4.61E-05       | 3.95E-05       | 0.857143 | 39.0141          | 0.072569         | 498.6029         |
| 1050           | 100            | 4.57E-05       | 4.35E-05       | 0.952381 | 35.5036          | 0.066039         | 502.1134         |
| 1050           | 110            | 4.53E-05       | 4.74E-05       | 1.047619 | 32.926           | 0.061244         | 504.691          |
| 1050           | 120            | 4.49E-05       | 5.13E-05       | 1.142857 | 31.7678          | 0.05909          | 505.8492         |

**Table S3.** Absorbance titration of **1**•**Ag**<sup>+</sup> with various concentration of **S**<sup>-2</sup>.

| V <sub>0</sub> | V <sub>t</sub> | C <sub>0</sub> | C <sub>t</sub> | eq       | A <sub>481</sub> | A/A <sub>0</sub> | A-A <sub>0</sub> |
|----------------|----------------|----------------|----------------|----------|------------------|------------------|------------------|
| 1100           | 0              | 0.00005        | 0              | 0        | 0.629088         | 1                | 0                |
| 1100           | 50             | 4.78E-05       | 0.000435       | 9.090909 | 1.426494         | 2.267557         | 0.797406         |
| 1100           | 60             | 4.74E-05       | 0.000517       | 10.90909 | 1.68086          | 2.671898         | 1.051772         |
| 1100           | 70             | 4.7E-05        | 0.000598       | 12.72727 | 1.90112          | 3.022024         | 1.272032         |
| 1100           | 80             | 4.66E-05       | 0.000678       | 14.54545 | 1.971163         | 3.133365         | 1.342075         |
| 1100           | 90             | 4.62E-05       | 0.000756       | 16.36364 | 1.997812         | 3.175726         | 1.368724         |
| 1100           | 100            | 4.58E-05       | 0.000833       | 18.18182 | 2.011443         | 3.197393         | 1.382355         |
| 1100           | 110            | 4.55E-05       | 0.000909       | 20       | 2.024318         | 3.21786          | 1.39523          |
| 1100           | 120            | 4.51E-05       | 0.000984       | 21.81818 | 2.024366         | 3.217936         | 1.395278         |
| 1100           | 130            | 4.47E-05       | 0.001057       | 23.63636 | 2.018826         | 3.20913          | 1.389738         |
| 1100           | 140            | 4.44E-05       | 0.001129       | 25.45455 | 2.00231          | 3.182875         | 1.373221         |

**Table S4.** Fluorescence titration of **1**•**Ag**<sup>+</sup> with various concentration of **S**<sup>-2</sup>.

| V <sub>0</sub> | V <sub>t</sub> | C <sub>0</sub> | C <sub>t</sub> | eq | I <sub>518</sub> | I/I <sub>0</sub> | I-I <sub>0</sub> |
|----------------|----------------|----------------|----------------|----|------------------|------------------|------------------|
| 1000           | 0              | 0.00005        | 0              | 0  | 10.3136          | 1                | 0                |
| 1000           | 30             | 4.85E-05       | 0.000291       | 6  | 209.224          | 20.28622         | 198.9104         |
| 1000           | 40             | 4.81E-05       | 0.000385       | 8  | 301.766          | 29.25904         | 291.4524         |
| 1000           | 50             | 4.76E-05       | 0.000476       | 10 | 354.259          | 34.34872         | 343.9454         |
| 1000           | 70             | 4.67E-05       | 0.000654       | 14 | 397.374          | 38.52913         | 387.0604         |
| 1000           | 80             | 4.63E-05       | 0.000741       | 16 | 401.252          | 38.90513         | 390.9384         |
| 1000           | 90             | 4.59E-05       | 0.000826       | 18 | 408.392          | 39.59742         | 398.0784         |
| 1000           | 100            | 4.55E-05       | 0.000909       | 20 | 410.822          | 39.83304         | 400.5084         |

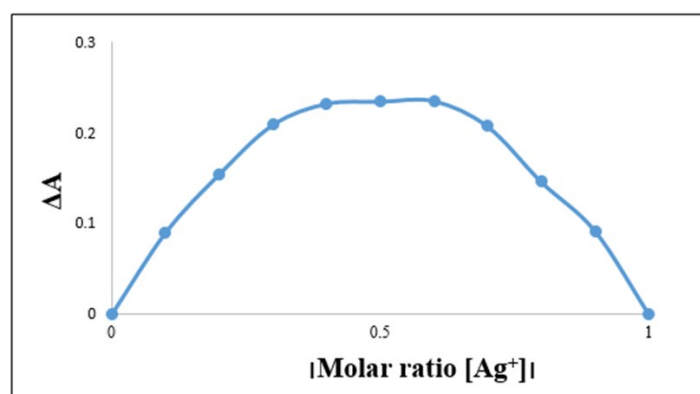**Figure S14.** Job plot for the binding of **1** and **Ag**<sup>+</sup>.



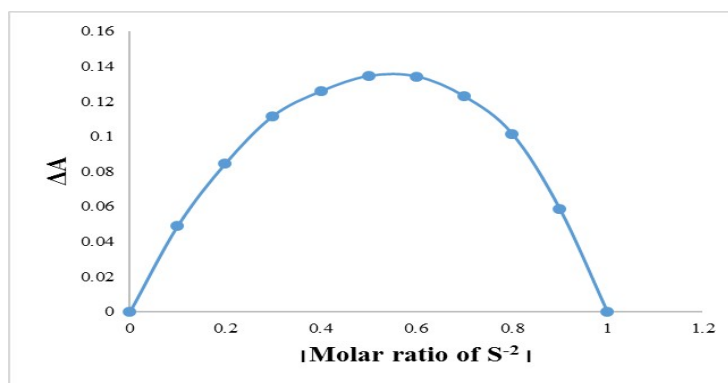

**Figure S15.** Job plot for the binding of **1**•Ag<sup>+</sup> and S<sup>2-</sup>.

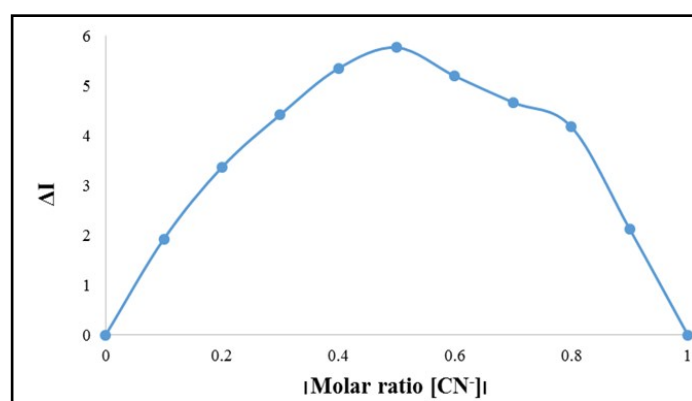

**Figure S16.** Job plot for the binding of **1** and CN<sup>-</sup>.

**Table S5.** Absorbance titration of **1** with various concentration of CN<sup>-</sup>.

| V <sub>0</sub> | V <sub>t</sub> | C <sub>0</sub> | C <sub>t</sub> | eq  | A <sub>400</sub> | A/A <sub>0</sub> | A-A <sub>0</sub> |
|----------------|----------------|----------------|----------------|-----|------------------|------------------|------------------|
| 1000           | 0              | 0.00005        | 0              | 0   | 0.613093         | 1                | 0                |
| 1000           | 10             | 4.95E-05       | 9.9E-06        | 0.2 | 0.51695          | 0.843183         | 0.096143         |
| 1000           | 20             | 4.9E-05        | 1.96E-05       | 0.4 | 0.457039         | 0.745465         | 0.156054         |
| 1000           | 30             | 4.85E-05       | 2.91E-05       | 0.6 | 0.431294         | 0.703473         | 0.181799         |
| 1000           | 40             | 4.81E-05       | 3.85E-05       | 0.8 | 0.390916         | 0.637613         | 0.222177         |
| 1000           | 60             | 4.72E-05       | 5.66E-05       | 1.2 | 0.379062         | 0.618277         | 0.234032         |
| 1000           | 70             | 4.67E-05       | 6.54E-05       | 1.4 | 0.341403         | 0.556852         | 0.271691         |
| 1000           | 80             | 4.63E-05       | 7.41E-05       | 1.6 | 0.326983         | 0.533334         | 0.28611          |
| 1000           | 90             | 4.59E-05       | 8.26E-05       | 1.8 | 0.332743         | 0.542728         | 0.28035          |
| 1000           | 100            | 4.55E-05       | 9.09E-05       | 2   | 0.315424         | 0.51448          | 0.297669         |
| 1000           | 110            | 4.5E-05        | 9.91E-05       | 2.2 | 0.304735         | 0.497045         | 0.308359         |
| 1000           | 120            | 4.46E-05       | 0.000107       | 2.4 | 0.301956         | 0.492513         | 0.311137         |
| 1000           | 130            | 4.42E-05       | 0.000115       | 2.6 | 0.294907         | 0.481014         | 0.318187         |
| 1000           | 140            | 4.39E-05       | 0.000123       | 2.8 | 0.280305         | 0.457199         | 0.332788         |
| 1000           | 150            | 4.35E-05       | 0.00013        | 3   | 0.27594          | 0.450079         | 0.337153         |
| 1000           | 200            | 4.17E-05       | 0.000167       | 4   | 0.271052         | 0.442105         | 0.342041         |

**Table S6.** Fluorescence titration of **1** with various concentration of **CN<sup>-</sup>**.

| V <sub>0</sub> | V <sub>t</sub> | C <sub>0</sub> | C <sub>t</sub> | eq | I <sub>447</sub> | I/I <sub>0</sub> | I-I <sub>0</sub> |
|----------------|----------------|----------------|----------------|----|------------------|------------------|------------------|
| 2000           | 0              | 0.00005        | 0              | 0  | 204.663          | 1                | 0                |
| 2000           | 20             | 4.9505E-05     | 9.9E-05        | 2  | 187.983          | 0.9185           | -16.68           |
| 2000           | 40             | 4.90196E-05    | 0.000196       | 4  | 171.303          | 0.837            | -33.36           |
| 2000           | 60             | 4.85437E-05    | 0.000291       | 6  | 156.765          | 0.765966         | -47.898          |
| 2000           | 80             | 4.80769E-05    | 0.000385       | 8  | 145.227          | 0.709591         | -59.436          |
| 2000           | 100            | 4.7619E-05     | 0.000476       | 10 | 131.689          | 0.643443         | -72.974          |
| 2000           | 130            | 4.69484E-05    | 0.00061        | 13 | 117.43           | 0.573772         | -87.233          |
| 2000           | 150            | 4.65116E-05    | 0.000698       | 15 | 106.774          | 0.521706         | -97.889          |
| 2000           | 200            | 4.54545E-05    | 0.000909       | 20 | 83.859           | 0.409742         | -120.804         |

**Table S7.** Absorbance titration of **1•Ag<sup>+</sup>** with various concentration of **HS<sup>-</sup>**.

| V <sub>0</sub> | V <sub>t</sub> | C <sub>0</sub> | C <sub>t</sub> | eq        | A <sub>530</sub> | A/A <sub>0</sub> | A-A <sub>0</sub> |
|----------------|----------------|----------------|----------------|-----------|------------------|------------------|------------------|
| 600            | 0              | 0.00005        | 0              | 0         | 0.456097         | 1                | 0                |
| 600            | 20             | 4.84E-05       | 0.000161       | 3.333333  | 0.434968         | 0.953674         | -0.02113         |
| 600            | 30             | 4.76E-05       | 0.000238       | 5         | 0.398087         | 0.872813         | -0.05801         |
| 600            | 40             | 4.69E-05       | 0.000313       | 6.666667  | 0.288653         | 0.632877         | -0.16744         |
| 600            | 50             | 4.62E-05       | 0.000385       | 8.333333  | 0.243876         | 0.534702         | -0.21222         |
| 600            | 60             | 4.55E-05       | 0.000455       | 10        | 0.205042         | 0.449558         | -0.25105         |
| 600            | 80             | 4.41E-05       | 0.000588       | 13.333333 | 0.162808         | 0.356959         | -0.29329         |
| 600            | 100            | 4.29E-05       | 0.000714       | 16.666667 | 0.145211         | 0.318377         | -0.31089         |

**Table S8.** Fluorescence titration of **1•Ag<sup>+</sup>** with various concentration of **HS<sup>-</sup>**.

| V <sub>0</sub> | V <sub>t</sub> | C <sub>0</sub> | C <sub>t</sub> | eq       | I <sub>447</sub> | I/I <sub>0</sub> | I-I <sub>0</sub> |
|----------------|----------------|----------------|----------------|----------|------------------|------------------|------------------|
| 1100           | 0              | 0.00005        | 0              | 0        | 13.1849          | 1                | 0                |
| 1100           | 20             | 4.91E-05       | 0.000179       | 3.636364 | 22.0246          | 1.670441         | 8.8397           |
| 1100           | 30             | 4.87E-05       | 0.000265       | 5.454545 | 27.7724          | 2.106379         | 14.5875          |
| 1100           | 50             | 4.78E-05       | 0.000435       | 9.090909 | 41.8718          | 3.175739         | 28.6869          |
| 1100           | 60             | 4.74E-05       | 0.000517       | 10.90909 | 45.35            | 3.439541         | 32.1651          |
| 1100           | 70             | 4.7E-05        | 0.000598       | 12.72727 | 48.4412          | 3.673991         | 35.2563          |
| 1100           | 80             | 4.66E-05       | 0.000678       | 14.54545 | 51.2282          | 3.885369         | 38.0433          |
| 1100           | 90             | 4.62E-05       | 0.000756       | 16.36364 | 53.8082          | 4.081047         | 40.6233          |
| 1100           | 100            | 4.58E-05       | 0.000833       | 18.18182 | 55.3848          | 4.200623         | 42.1999          |
| 1100           | 110            | 4.55E-05       | 0.000909       | 20       | 57.0521          | 4.327079         | 43.8672          |
| 1100           | 120            | 4.51E-05       | 0.000984       | 21.81818 | 58.7024          | 4.452245         | 45.5175          |
| 1100           | 160            | 4.37E-05       | 0.00127        | 29.09091 | 60.6556          | 4.600384         | 47.4707          |
| 1100           | 180            | 4.3E-05        | 0.001406       | 32.72727 | 59.3916          | 4.504517         | 46.2067          |

**Table S9.** Fluorescence titration of  $1 \cdot \text{Ag}^+$  with various concentration of  $\text{S}^{2-}$  in PBS buffer solution at pH 7.4.

| $V_0$ | $V_t$ | $C_0$    | $C_t$    | Eq       | $I_{(510)}$ | $I/I_0$  | $I-I_0$  |
|-------|-------|----------|----------|----------|-------------|----------|----------|
| 1150  | 0     | 0.001304 | 0        | 0        | 40.3182     | 1        | 0        |
| 1150  | 10    | 0.001293 | 8.62E-05 | 0.066667 | 61.1557     | 1.516826 | 20.8375  |
| 1150  | 20    | 0.001282 | 0.000171 | 0.133333 | 72.7132     | 1.803483 | 32.395   |
| 1150  | 30    | 0.001271 | 0.000254 | 0.2      | 84.1091     | 2.086132 | 43.7909  |
| 1150  | 40    | 0.001261 | 0.000336 | 0.266667 | 101.683     | 2.522012 | 61.3648  |
| 1150  | 50    | 0.00125  | 0.000417 | 0.333333 | 119.375     | 2.960822 | 79.0568  |
| 1150  | 60    | 0.00124  | 0.000496 | 0.4      | 129.997     | 3.224276 | 89.6788  |
| 1150  | 90    | 0.00121  | 0.000726 | 0.6      | 177.863     | 4.411482 | 137.5448 |
| 1150  | 100   | 0.0012   | 0.0008   | 0.666667 | 191.01      | 4.737563 | 150.6918 |
| 1150  | 110   | 0.00119  | 0.000873 | 0.733333 | 197.458     | 4.89749  | 157.1398 |
| 1150  | 120   | 0.001181 | 0.000945 | 0.8      | 216.446     | 5.368444 | 176.1278 |
| 1150  | 130   | 0.001172 | 0.001016 | 0.866667 | 223.655     | 5.547247 | 183.3368 |
| 1150  | 140   | 0.001163 | 0.001085 | 0.933333 | 238.716     | 5.9208   | 198.3978 |
| 1150  | 150   | 0.001154 | 0.001154 | 1        | 257.648     | 6.390365 | 217.3298 |
| 1150  | 160   | 0.001145 | 0.001221 | 1.066667 | 276.475     | 6.857325 | 236.1568 |

**Table S10.** Fluorescence titration of  $1 \cdot \text{Ag}^+$  with various concentration of  $\text{HS}^-$  in PBS buffer solution at pH 7.4.

| $V_0$ | $V_t$ | $C_0$    | $C_t$    | Eq       | $I_{(510)}$ | $I/I_0$  | $I-I_0$ |
|-------|-------|----------|----------|----------|-------------|----------|---------|
| 1100  | 0     | 0.00005  | 0        | 0        | 44.3014     | 1        | 0       |
| 1100  | 40    | 4.82E-05 | 0.000351 | 7.272727 | 52.542      | 1.186012 | 8.2406  |
| 1100  | 50    | 4.78E-05 | 0.000435 | 9.090909 | 53.3121     | 1.203395 | 9.0107  |
| 1100  | 60    | 4.74E-05 | 0.000517 | 10.90909 | 55.2092     | 1.246218 | 10.9078 |
| 1100  | 70    | 4.7E-05  | 0.000598 | 12.72727 | 58.5696     | 1.322071 | 14.2682 |
| 1100  | 90    | 4.62E-05 | 0.000756 | 16.36364 | 61.4954     | 1.388114 | 17.194  |
| 1100  | 100   | 4.58E-05 | 0.000833 | 18.18182 | 61.9905     | 1.39929  | 17.6891 |
| 1100  | 110   | 4.55E-05 | 0.000909 | 20       | 63.8552     | 1.441381 | 19.5538 |
| 1100  | 120   | 4.51E-05 | 0.000984 | 21.81818 | 63.9912     | 1.444451 | 19.6898 |
| 1100  | 130   | 4.47E-05 | 0.001057 | 23.63636 | 64.4144     | 1.454004 | 20.113  |
| 1100  | 140   | 4.44E-05 | 0.001129 | 25.45455 | 65.7096     | 1.48324  | 21.4082 |
| 1100  | 150   | 0.000044 | 0.0012   | 27.27273 | 66.4397     | 1.49972  | 22.1383 |
| 1100  | 160   | 4.37E-05 | 0.00127  | 29.09091 | 66.8775     | 1.509602 | 22.5761 |
| 1100  | 170   | 4.33E-05 | 0.001339 | 30.90909 | 67.6349     | 1.526699 | 23.3335 |
| 1100  | 180   | 4.3E-05  | 0.001406 | 32.72727 | 68.9433     | 1.556233 | 24.6419 |

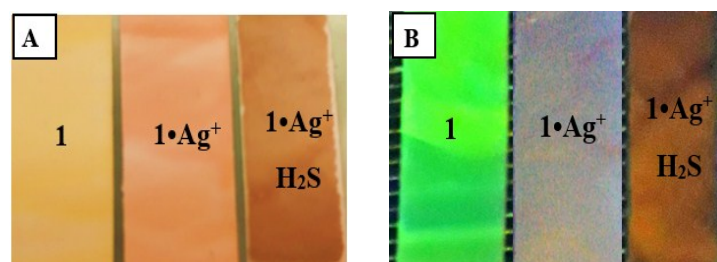

**Figure S17.** portable kit of  $\text{Ag}^+$ ,  $\text{H}_2\text{S}$ : The naked eye (**A**, under visible light) and fluorescence (**B**, under 366 nm UV light)

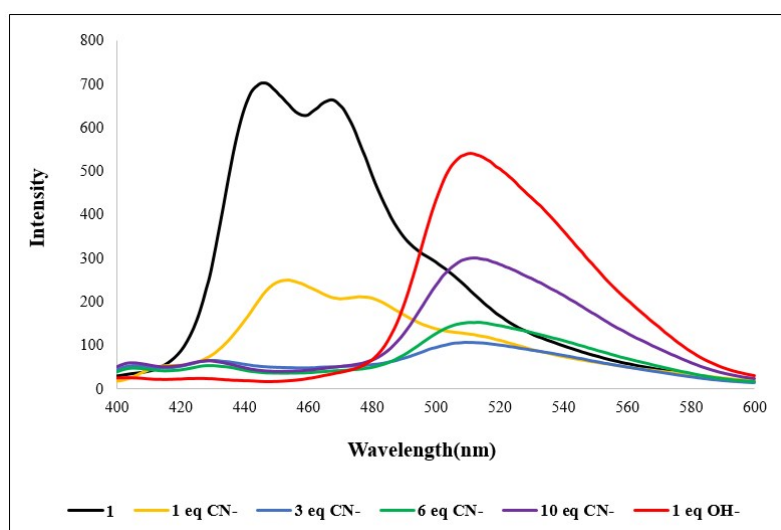

**Figure S18.** The comparison of Fluorescence spectra of **1** under addition of  $\text{OH}^-$  and  $\text{CN}^-$  ions in non-buffered solution at pH = 6.

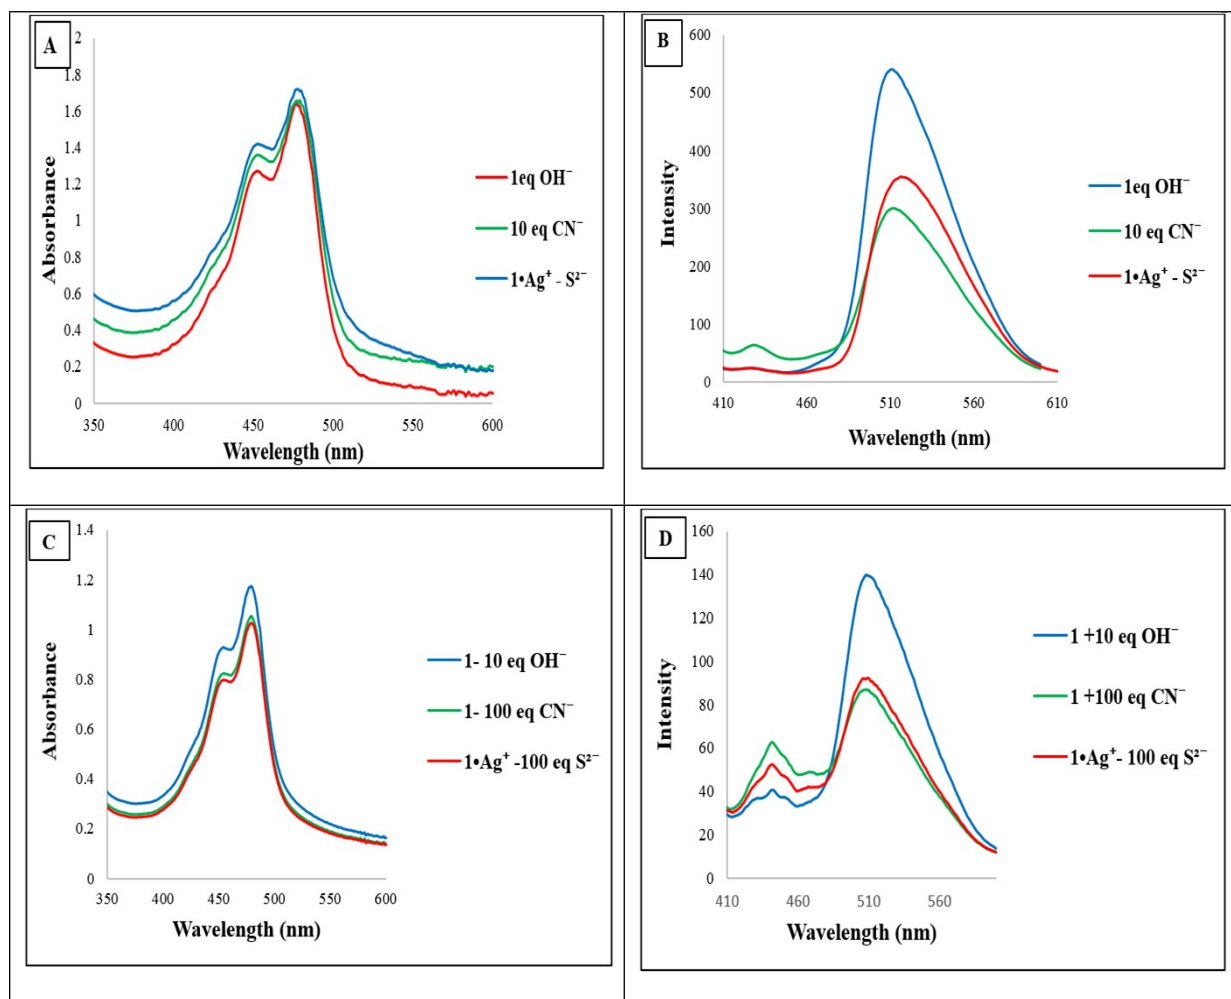

**Figure S19.** The comparison of UV-Vis and Fluorescence spectra of **1** under addition of OH<sup>-</sup> and CN<sup>-</sup> ions and 1•Ag<sup>+</sup> under addition of S<sup>2-</sup> in non-buffered solution at pH = 6.

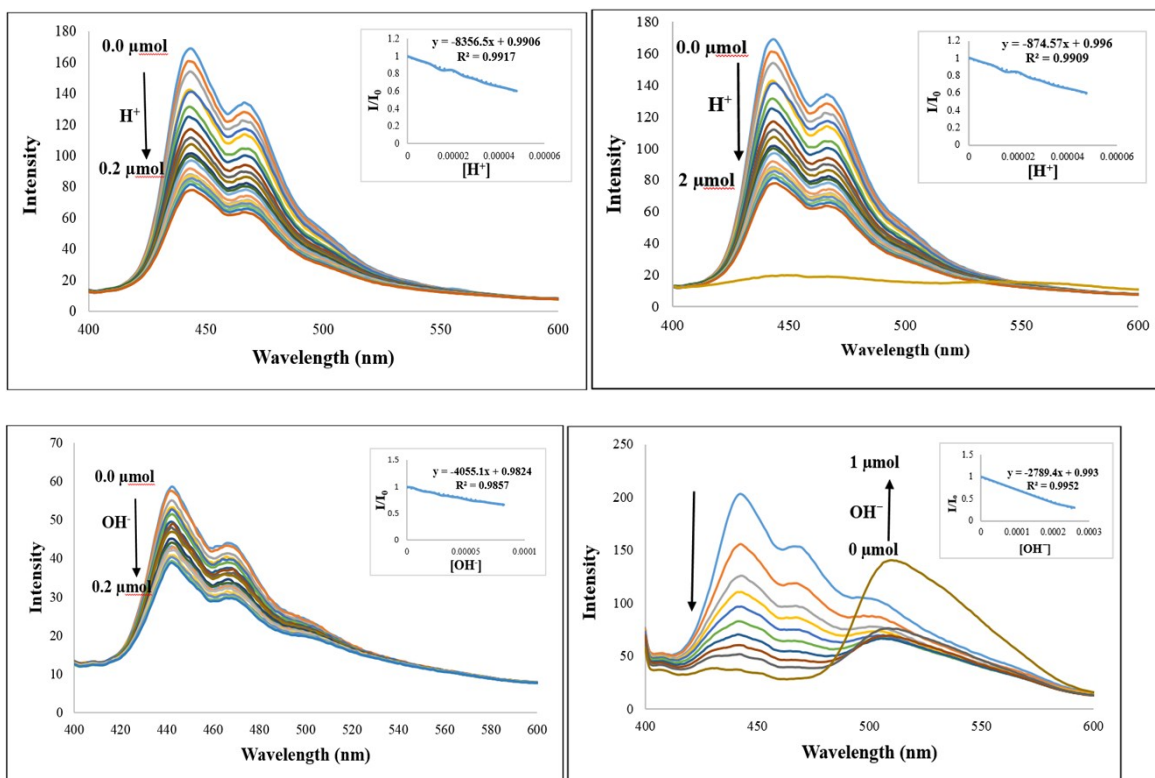

**Figure S20.** The titration of buffer solution **1** (pH 7) under addition of (above) 1 and 10 eqiv. of HCl (below) 1 and 10 eqiv. NaOH.

**Table S11.** Comparison of 1 with other probes for detection of silver ions

| Chemical Structure                                                                  | Method      | Sensing ions                | Solvent medium                              | LOD                                                       | Reference Number |
|-------------------------------------------------------------------------------------|-------------|-----------------------------|---------------------------------------------|-----------------------------------------------------------|------------------|
| 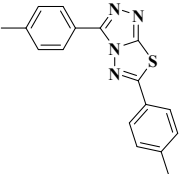   | Fluorescent | Ag <sup>+</sup><br>Cysteine | THF/H <sub>2</sub> O                        | 2.87 × 10 <sup>9</sup> M                                  | 9                |
|    | Fluorescent | Ag <sup>+</sup>             | H <sub>2</sub> O                            | 17.4nM                                                    | 10               |
|    | Fluorescent | Ag <sup>+</sup>             | EtOH                                        | 10 <sup>-7</sup> M                                        | 11               |
|   | Fluorescent | Ag <sup>+</sup>             | MeOH/H <sub>2</sub> O<br>8:2                | 3.67 μM (Ag <sup>+</sup> )<br>0.69 nM (Hg <sup>+2</sup> ) | 12               |
|  | Fluorescent | Ag <sup>+</sup>             | DMF/H <sub>2</sub> O<br>50:50               | 1.12 μM                                                   | 13               |
|  | uv-vis      | Ag <sup>+</sup>             | H <sub>2</sub> O                            | 2.43 μM                                                   | 14               |
|  | Fluorescent | Ag <sup>+</sup>             | CH <sub>3</sub> CN, H <sub>2</sub> O<br>1:9 | 12.8 × 10 <sup>-9</sup> M                                 | 15               |
|  | UV-Vis      | Ag <sup>+</sup>             | H <sub>2</sub> O                            | 0.85 μM                                                   | 16               |
|  | Fluorescent | Ag <sup>+</sup>             | (EtOH/PBS)<br>1:9                           | 0.03 μM                                                   | 17               |

**Table S12.** Comparison of **1** with other probes for detection of cyanide ions *via* deprotonation.

| Chemical Structure | Method                | Sensing ions                                                                                                                               | Solvent medium                                               | LOD       | Reference Number |
|--------------------|-----------------------|--------------------------------------------------------------------------------------------------------------------------------------------|--------------------------------------------------------------|-----------|------------------|
|                    | Fluorescent<br>UV-Vis | CN <sup>-</sup> , HCO <sub>3</sub> <sup>-</sup> ,<br>CO <sub>3</sub> <sup>2-</sup> -<br>the weak<br>selectivity<br>and weak<br>sensitivity | H <sub>2</sub> O–<br>MeOH<br>(v/v,2/5)                       | -         | 18               |
|                    | Fluorescent<br>UV-Vis | Cyanide                                                                                                                                    | H <sub>2</sub> O                                             | 0.32 μmol | 19               |
|                    | UV-Vis                | Fluoride &<br>Cyanide                                                                                                                      | CH <sub>3</sub> CN–<br>H <sub>2</sub> O (9:1)                | 17.7 μmol | 20               |
|                    | Fluorescent<br>UV-Vis | CN<br>Job (2:1)                                                                                                                            | DMSO/H <sub>2</sub><br>O (9:1)                               | 0.4 μmol  | 21               |
|                    | Fluorescent<br>UV-Vis | cyanide                                                                                                                                    | CH <sub>3</sub> CN–<br>DMSO–<br>H <sub>2</sub> O<br>(94:1:5) | 0.25 μmol | 22               |
|                    | UV-Vis                | cyanide                                                                                                                                    | CH <sub>3</sub> CN–<br>H <sub>2</sub> O (95 :<br>5)          | 8 μmol    | 23               |
|                    | UV-Vis                | cyanide                                                                                                                                    | CH <sub>3</sub> CN -<br>buffer (1:1)                         | 1.2 μmol  | 24               |
|                    | UV-Vis                | cyanide<br>Job (1:1)                                                                                                                       | CH <sub>3</sub> CN/bis-<br>tris buffer<br>solution<br>(3:7)  | 210 mM    | 25               |
|                    | UV-Vis                | cyanide<br>Job (1:1)<br>Intereferes in<br>organic<br>media                                                                                 |                                                              | 105 mM    | 26               |



**Table S13.** Comparison of **1** with other probes for detection of sulfide ions

| Chemical Structure                                                                  | Method                | Sensing ions                        | Solvent medium             | LOD                       | Reference Number |
|-------------------------------------------------------------------------------------|-----------------------|-------------------------------------|----------------------------|---------------------------|------------------|
| 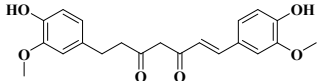   | UV-Vis                | S <sup>2-</sup>                     | buffer (pH 9)              | 0.4 ng ml <sup>-1</sup>   | 27               |
|    | Fluorescent           | H <sub>2</sub> S                    | PBS buffer                 | 0.25 μM                   | 28               |
|    | Fluorescent On-Off-On | CuS                                 | H <sub>2</sub> O           | 1.35 × 10 <sup>-6</sup> M | 29               |
|    | Fluorescent           | Na <sub>2</sub> S, H <sub>2</sub> S | HEPES buffer (pH 7.4)      | 50 nM                     | 30               |
|   | Fluorescent UV-Vis    | Cu <sub>2</sub> S                   | HEPES buffer, pH 7.4       | 11.4 μM                   | 31               |
|  | Fluorescent on        | H <sub>2</sub> S                    | aqueous buffer and in vivo | 0.057 mM                  | 32               |
|  | UV-Vis                | H <sub>2</sub> S                    | H <sub>2</sub> O           | 0.16mg/L                  | 33               |
|  | Fluorescent on        | H <sub>2</sub> S                    | PBS buffer pH 7.4          | 41 nM                     | 34               |
|  | Fluorescent UV-Vis    | H <sub>2</sub> S, Na <sub>2</sub> S | H <sub>2</sub> O           | 1.17 mM, 1.28 mM          | 35               |
|  | Fluorescent UV-Vis    | H <sub>2</sub> S                    | PBS buffer pH 7.4          | 6.87 mM                   | 36               |
